# Supplementary material
Source: PubMed Central journal article supplement (PMC2775390)

# Supplementary Figure S1

## Data analysis (subjects RB2 & RB3)

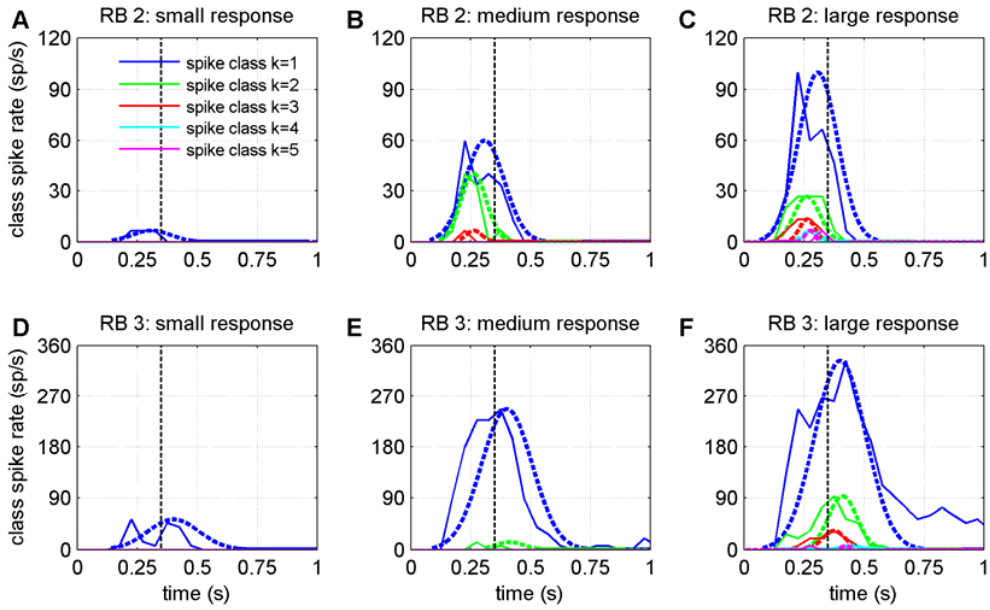

## Model results (subjects RB2 & RB3)

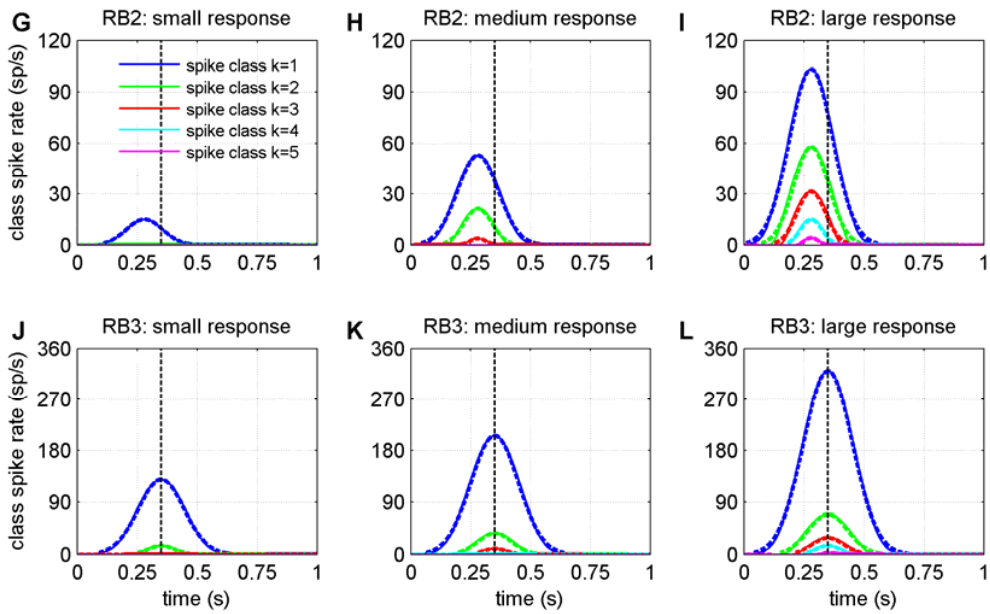

Supplement: 00204.2009_1.pdf [file 00204.2009_1.pdf]

## Supplementary Figure S2

### Data analysis (subjects RB2 & RB3)

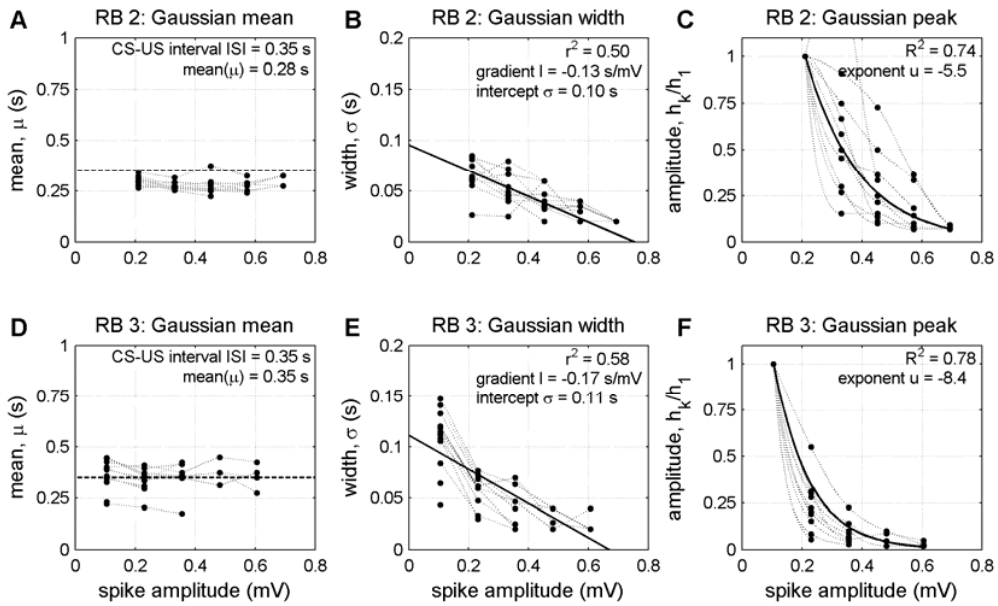

### Model results (subjects RB2 & RB3)

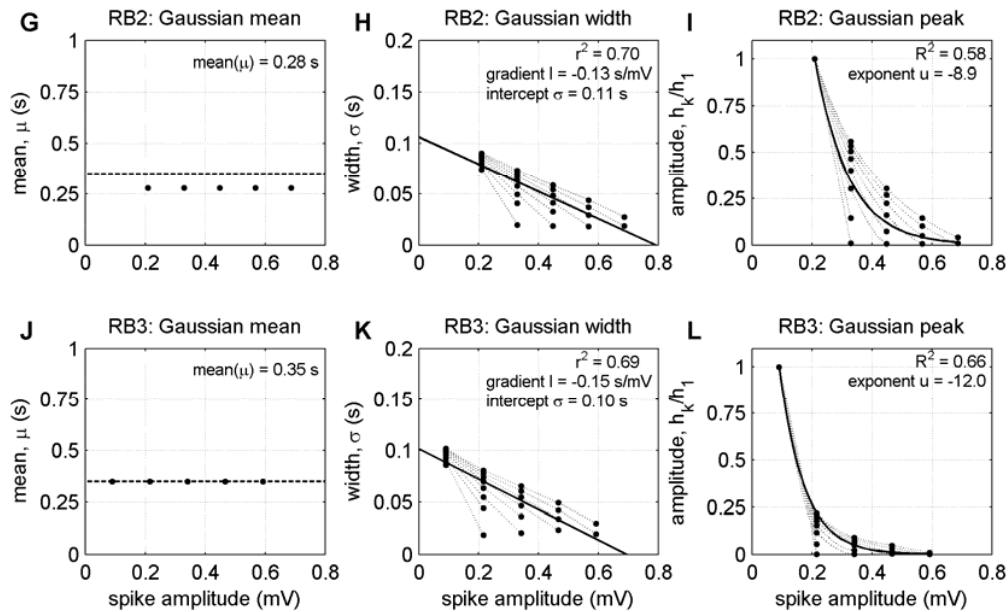

Supplement: 00204.2009_2.pdf [file 00204.2009_2.pdf]

## Supplementary Figure S3

### Data analysis (subjects RB2 & RB3)

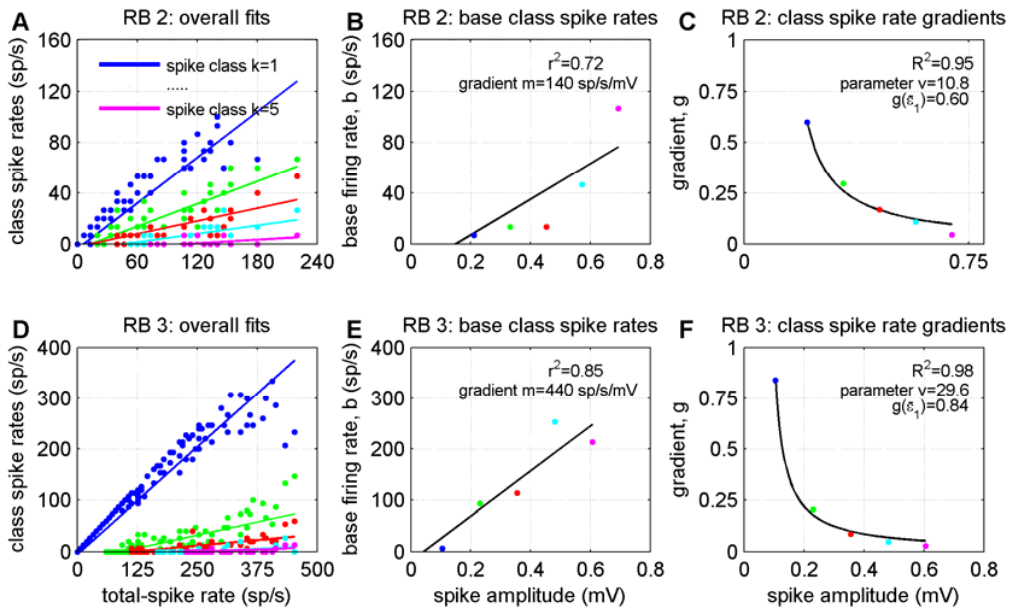

### Model results (subjects RB2 & RB3)

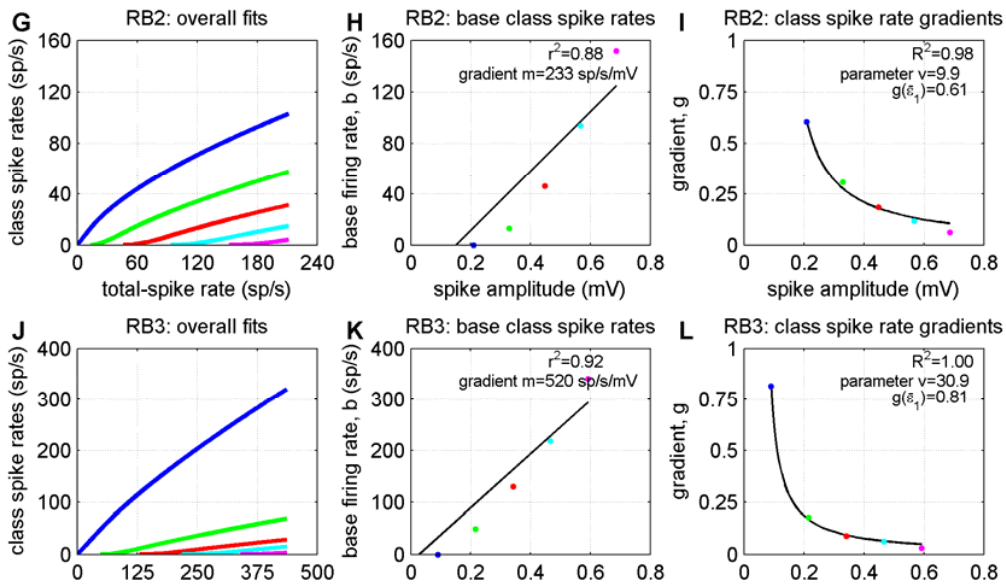

Supplement: 00204.2009_3.pdf [file 00204.2009_3.pdf]
